# Supplementary material
Source: publisher figshare collection journal article supplement (https://acs.figshare.com/ndownloader/files/4701988)
Supplement: Supplementary file 1 [file 4701988]

## SUPPORTING MATERIAL

### The photoinduced electron transfer between the cationic complexes

$\text{Ru}(\text{NH}_3)_5\text{pz}^{2+}$  and *trans*- $[\text{RuCl}([\text{15}] \text{aneN}_4)\text{NO}]^{2+}$  mediated by phosphate ion.

### Visible light generation of nitric oxide for biological targets

Roberto S. da Silva,\* Mario S. P. Marchesi, Chosu Khin, Claire Lunardi, Lusiane M. Bendhack, and Peter C. Ford\*

### Supplementary Figures

**Figure S1:** Franz cell utilized for measuring the diffusion rate of ruthenium complexes from a water/oil emulsion containing  $\text{RuNO}^{2+}$ ,  $\text{Rupz}^{2+}$  or a mixture of the two in 10 mM pH7.4 phosphate buffer solution. Concentration of each complex in the emulsion is 1 mM.

**Figure S2:** Chamber utilized for the pharmacological assays.

**Figure S3:** Electronic spectrum of *trans*- $[\text{RuCl}([\text{15}] \text{aneN}_4)(\text{NO})][\text{BF}_4]_3$  (0.15 mM) in aqueous phosphate buffer solution (10 mM, pH 7.4).

**Figure S4:** *Dashed line:* Electronic spectrum of  $[\text{Ru}(\text{NH}_3)_5(\text{pz})][\text{BF}_4]_2$  ( $2.7 \times 10^{-5}$  M) in aqueous solution. *Solid line:* Aqueous solution containing *trans*- $[\text{RuCl}([\text{15}] \text{aneN}_4)(\text{NO})][\text{BF}_4]_3$  ( $8 \times 10^{-5}$  M) and  $[\text{Ru}(\text{NH}_3)_5(\text{pz})][\text{BF}_4]_2$  ( $2.7 \times 10^{-5}$  M) with no phosphate added.

**Figure S5:** Electronic spectrum of  $[\text{Ru}(\text{NH}_3)_5(\text{pz})\text{Ru}([\text{15}] \text{aneN}_4)\text{Cl}]^{4+}$  in aqueous solution prepared by reacting  $\text{Ru}(\text{NH}_3)_5(\text{pz})^{3+}$  with *trans*- $\text{RuCl}([\text{15}] \text{aneN}_4)(\text{H}_2\text{O})^{2+}$ .

**Figure S6:** Time course of NO release from  $\text{RuNO}^{2+}:\text{Rupz}^{2+}$  (1 mM) entrapped in a w/o emulsion under 436 nm light irradiation, in 10 mM phosphate buffer solution pH 7.4. Mass membrane = 0.200 g.

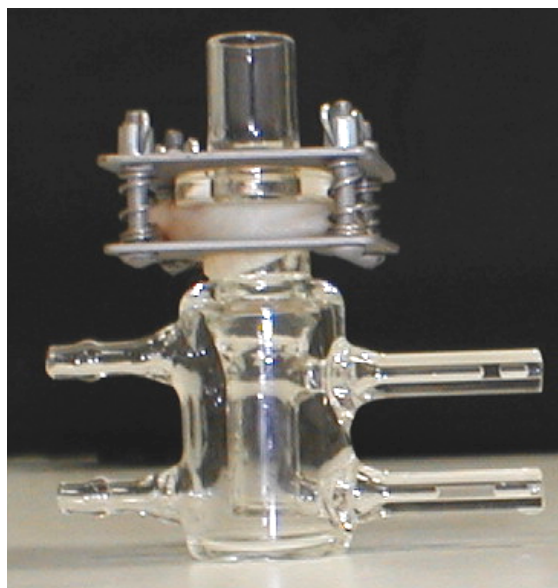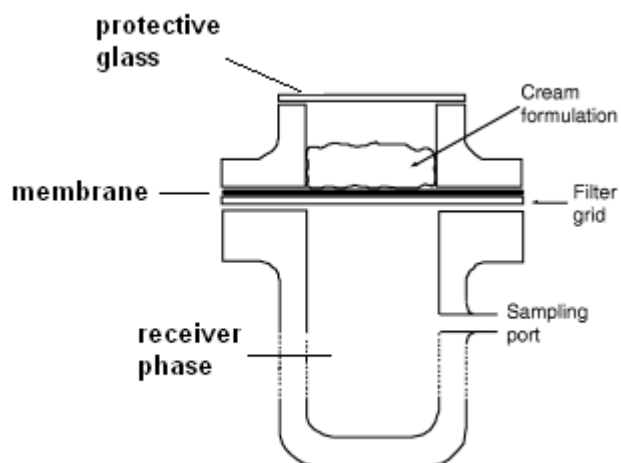

**Figure S1:** Franz cell utilized for measuring the the diffusion rate of ruthenium complexes from a water/oil emulsion containing  **$\text{RuNO}^{2+}$** ,  **$\text{Rupz}^{2+}$**  or a mixture of the two in 10 mM pH 7.4 phosphate buffer solution. Concentration of each complex in the emulsion is 1 mM.

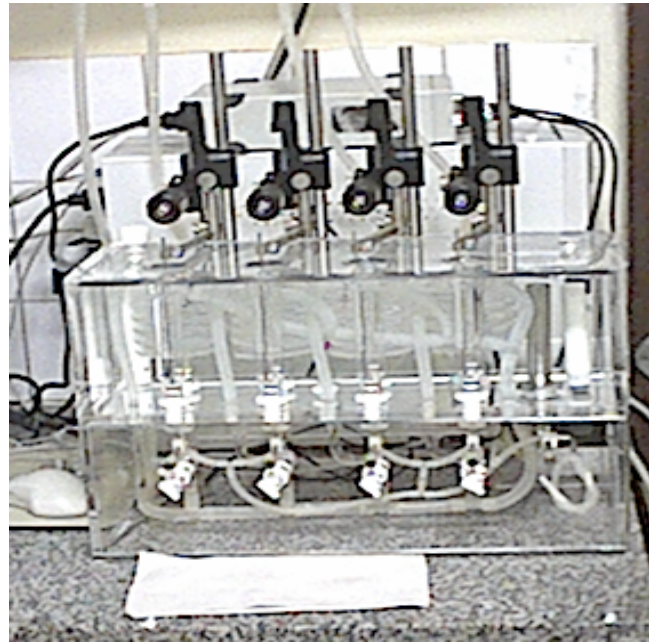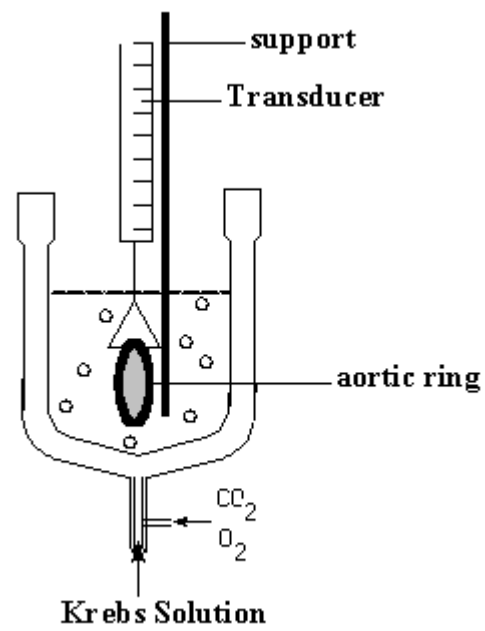

**Figure S2:** Chamber utilized for the pharmacological assays.

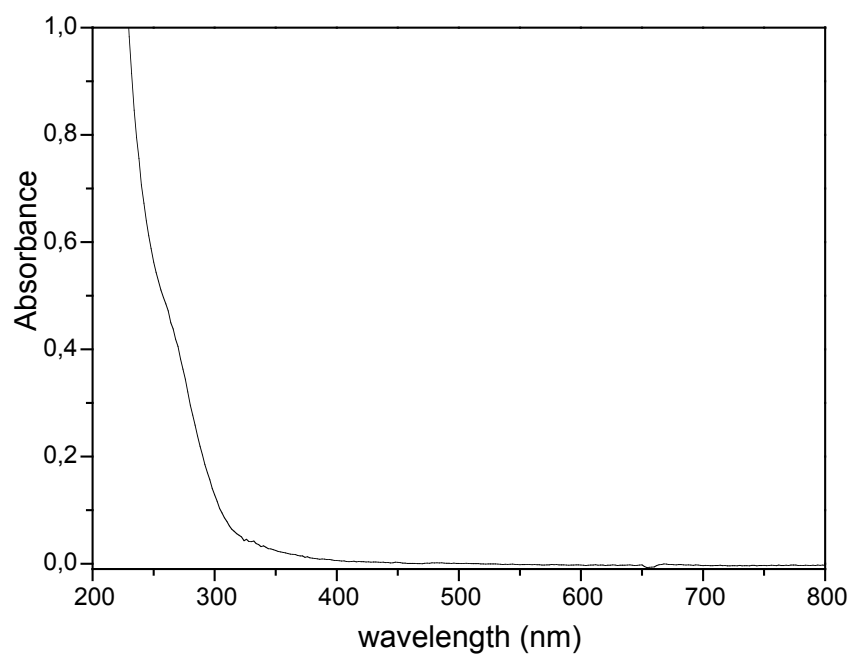

**Figure S3:** Electronic spectrum of *trans*-[RuCl([15]aneN<sub>4</sub>)(NO)][BF<sub>4</sub>]<sub>3</sub> (0.15 mM) in aqueous phosphate buffer solution (10 mM, pH 7.4).

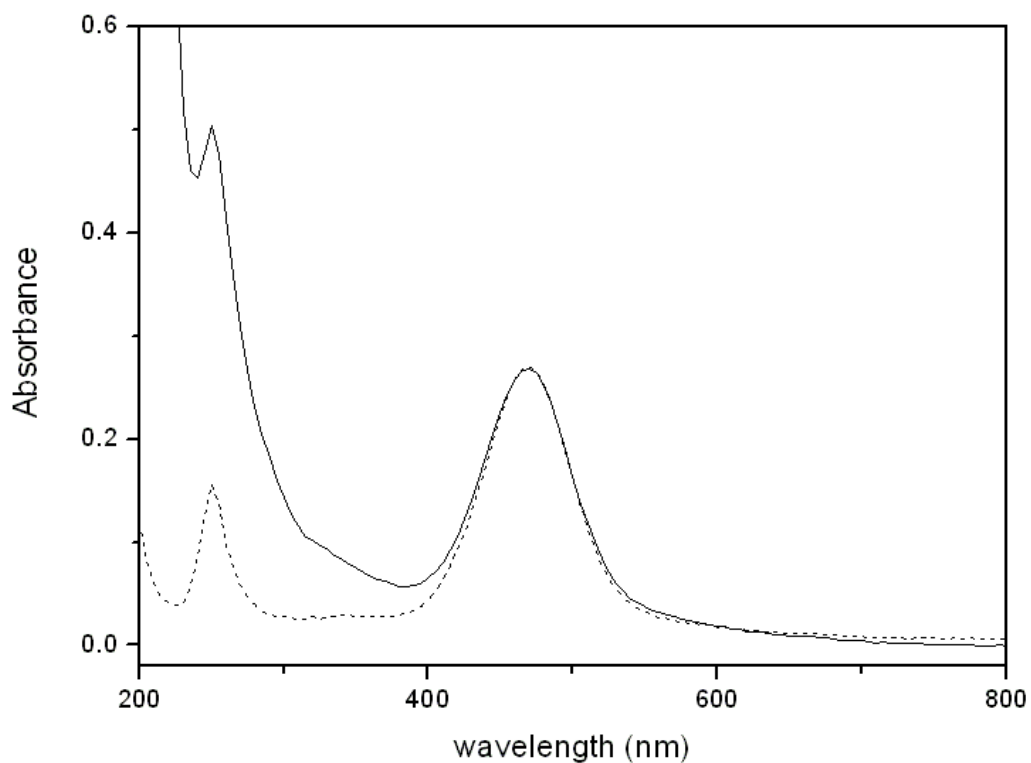

**Figure S4:** *Dashed line:* Electronic spectrum of [Ru(NH<sub>3</sub>)<sub>5</sub>(pz)][BF<sub>4</sub>]<sub>2</sub> (2.7 × 10<sup>-5</sup> M) in aqueous solution. *Solid line:* Aqueous solution containing *trans*-[RuCl([15]aneN<sub>4</sub>)(NO)][BF<sub>4</sub>]<sub>3</sub> (8 × 10<sup>-5</sup> M) and [Ru(NH<sub>3</sub>)<sub>5</sub>(pz)][BF<sub>4</sub>]<sub>2</sub> (2.7 × 10<sup>-5</sup> M) with no phosphate added.

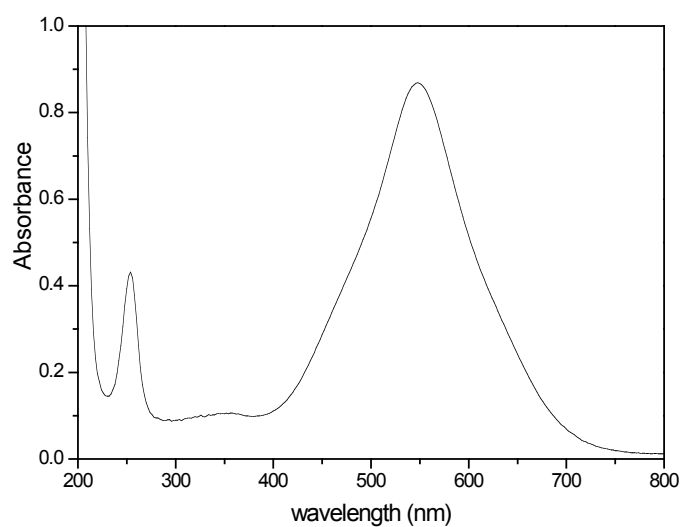

**Figure S5:** Electronic spectrum of  $[\text{Ru}^{\text{III}}(\text{NH}_3)_5(\text{pz})\text{Ru}^{\text{II}}([15]\text{aneN}_4)\text{Cl}]^{4+}$  in aqueous solution as prepared by reaction of  $\text{Ru}(\text{NH}_3)_5(\text{H}_2\text{O})^{3+}$  with *trans*- $\text{RuCl}([15]\text{aneN}_4)\text{pz}^+$  in aqueous solution.

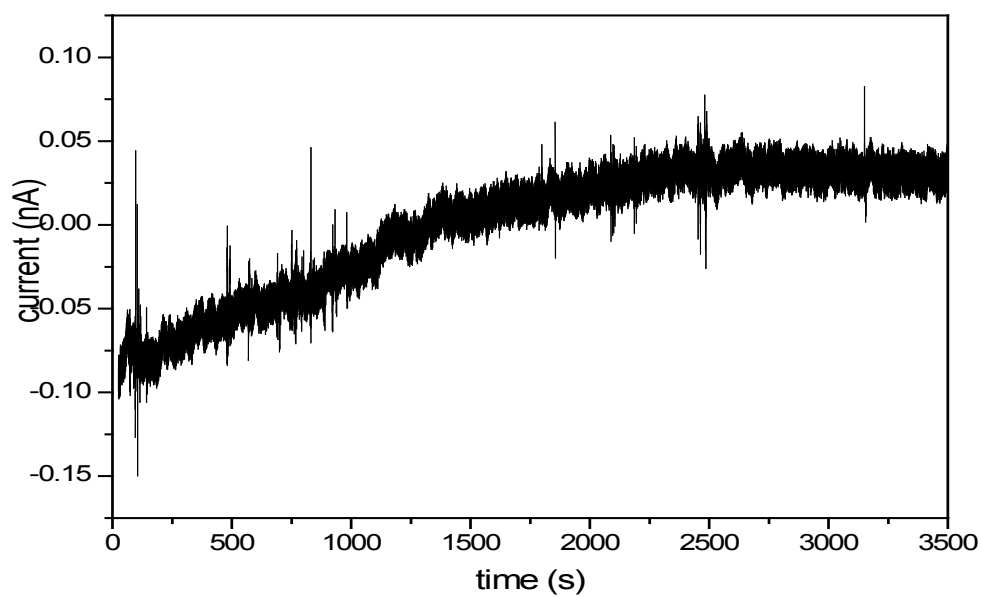

**Figure S6:** Time course of NO release from **RuNO<sup>2+</sup>:Rupz<sup>2+</sup>** (1 mM) entrapped in a *w/o* emulsion under 436 nm light irradiation, in 10 mM phosphate buffer solution pH 7.4. Mass membrane = 0.200 g.
